# Supplementary material for: Adult Honeybees and Beeswax as Indicators of Trace Elements Pollution in a Vulnerable Environment: Distribution among Different Apicultural Compartments
Source: MDPI journal article supplement (doi:10.3390/molecules27196629), 2022-10-06
Supplement: s1 [file s1]

# Honeybees and their products as bioindicators of heavy metals pollution in a vulnerable environment: distribution among different apicultural compartments

Effrosyni Zafeiraki,<sup>1,\*</sup> Rastislav Sabo,<sup>2</sup> Konstantinos M. Kasiotis,<sup>1,\*</sup> Kyriaki Machera,<sup>1</sup> Lucia Sabová,<sup>2</sup> Tomáš Majchrák<sup>2</sup>

**Table S1:** Correlation values between relevant bee samples (essential and toxic trace elements)

| Sample           | sampling location | B    | Al   | V    | Cr    | Mn     | Fe    | Co   | Ni    | Cu    | Zn     | As   | Sr   | Mo   | Ag   | Cd   | Sn    | Sb    | Ba   | Hg   | Pb   |
|------------------|-------------------|------|------|------|-------|--------|-------|------|-------|-------|--------|------|------|------|------|------|-------|-------|------|------|------|
| bees/<br>honey   | 1.Strážske_A      | 1.33 | 2.14 | n.d. | 1.97  | 34.90  | 8.80  | n.d. | 4.60  | 32.23 | 23.12  | n.d. | n.d. | n.d. | n.d. | n.d. | 1.66  | 0.46  | n.d. | 1.54 | 2.37 |
|                  | 2. Strážske_B     | 0.73 | 2.06 | n.d. | 24.01 | 67.17  | 32.10 | n.d. | 5.37  | n.d.  | 46.12  | n.d. | n.d. | n.d. | n.d. | n.d. | 10.16 | 1.03  | n.d. | 4.17 | n.d. |
|                  | 3.Poša            | 1.28 | 1.38 | n.d. | 3.87  | 32.23  | 11.46 | n.d. | 18.49 | n.d.  | 157.89 | n.d. | n.d. | n.d. | 5.36 | n.d. | 4.45  | 1.41  | n.d. | 2.24 | n.d. |
|                  | 4.Sedliska        | 1.34 | 5.05 | n.d. | 4.55  | 33.86  | 41.42 | n.d. | 7.89  | 25.93 | 60.80  | n.d. | n.d. | n.d. | n.d. | n.d. | 13.07 | 4.50  | n.d. | 2.40 | n.d. |
|                  | 5.Prešov          | 0.91 | 3.46 | n.d. | 3.67  | 149.11 | 54.41 | n.d. | 4.68  | n.d.  | 37.19  | n.d. | n.d. | n.d. | n.d. | n.d. | 0.80  | 4.57  | n.d. | 2.04 | 9.86 |
|                  | 6.Košice          | 1.49 | 8.78 | n.d. | 14.90 | 46.02  | 50.91 | n.d. | 16.77 | 28.45 | 46.28  | n.d. | n.d. | n.d. | 9.89 | n.d. | 12.03 | 26.40 | n.d. | 2.69 | 9.81 |
|                  | 7.Kurima          |      |      |      |       |        |       |      |       |       |        |      |      |      |      |      |       |       |      |      |      |
| larvae/<br>honey | 1.Strážske_A      | 1.65 | 1.19 | n.d. | 1.92  | 13.77  | 5.99  | n.d. | 4.11  | 45.26 | 42.13  | n.d. | n.d. | n.d. | n.d. | n.d. | 0.58  | 0.12  | n.d. | 0.74 | 0.66 |

|                 |               |      |      |      |       |       |         |      |       |       |        |      |      |      |      |      |       |      |      |      |      |
|-----------------|---------------|------|------|------|-------|-------|---------|------|-------|-------|--------|------|------|------|------|------|-------|------|------|------|------|
| bees/<br>pollen | 2. Strážske_B |      |      |      |       |       |         |      |       |       |        |      |      |      |      |      |       |      |      |      |      |
|                 | 3.Poša        | 1.14 | 0.98 | n.d. | 2.33  | 8.59  | 8.78    | n.d. | 26.16 | n.d.  | 162.70 | n.d. | n.d. | n.d. | n.d. | n.d. | 1.51  | 0.55 | n.d. | 1.30 | n.d. |
|                 | 4.Sedliska    | 1.80 | 2.87 | n.d. | 17.59 | 13.78 | 1127.50 | n.d. | 11.93 | 46.65 | 158.08 | n.d. | n.d. | n.d. | n.d. | n.d. | 21.12 | 1.27 | n.d. | 1.29 | n.d. |
|                 | 5.Prešov      | 1.05 | 1.71 | n.d. | 2.14  | 7.18  | 17.96   | n.d. | 5.91  | n.d.  | 36.47  | n.d. | n.d. | n.d. | n.d. | n.d. | 1.78  | 0.60 | n.d. | 1.00 | 2.59 |
|                 | 6.Košice      | 1.27 | 0.83 | n.d. | 1.66  | 4.10  | 9.88    | n.d. | 3.03  | 14.75 | 36.80  | n.d. | n.d. | n.d. | n.d. | n.d. | 2.51  | 0.64 | n.d. | 1.24 | 1.06 |
|                 | 7.Kurima      |      |      |      |       |       |         |      |       |       |        |      |      |      |      |      |       |      |      |      |      |
|                 | 1.Strážske_A  |      |      |      |       |       |         |      |       |       |        |      |      |      |      |      |       |      |      |      |      |
|                 | 2. Strážske_B |      |      |      |       |       |         |      |       |       |        |      |      |      |      |      |       |      |      |      |      |
|                 | 3.Poša        |      |      |      |       |       |         |      |       |       |        |      |      |      |      |      |       |      |      |      |      |
|                 | 4.Sedliska    | 0.21 | 0.65 | 0.48 | 1.55  | 0.73  | 1.14    | 1.69 | 0.38  | 0.90  | 0.91   | n.d. | 0.32 | 0.27 | 0.42 | 0.76 | 2.23  | 3.72 | 0.42 | 1.27 | 1.52 |
| 5.Prešov        |               |      |      |      |       |       |         |      |       |       |        |      |      |      |      |      |       |      |      |      |      |
| 6.Košice        | 0.19          | 0.84 | 0.81 | 2.04 | 0.74  | 0.90  | 0.81    | 1.54 | 0.98  | 0.69  | 1.15   | 0.90 | 1.04 | 7.11 | 0.41 | 2.80 | 15.77 | 0.59 | 1.39 | 2.02 |      |

|                   |               |      |      |      |      |      |       |      |      |      |      |      |      |      |      |      |      |      |      |      |      |
|-------------------|---------------|------|------|------|------|------|-------|------|------|------|------|------|------|------|------|------|------|------|------|------|------|
|                   | 7.Kurima      | 0.36 | 0.38 | 0.38 | 1.23 | 0.24 | 0.87  | 0.49 | 0.17 | 1.34 | 1.34 | 0.99 | 0.35 | 0.77 | 0.51 | 0.25 | 0.65 | 1.29 | 0.28 | 1.15 | 0.87 |
|                   | 1.Strážske_A  |      |      |      |      |      |       |      |      |      |      |      |      |      |      |      |      |      |      |      |      |
|                   | 2. Strážske_B |      |      |      |      |      |       |      |      |      |      |      |      |      |      |      |      |      |      |      |      |
|                   | 3.Poša        |      |      |      |      |      |       |      |      |      |      |      |      |      |      |      |      |      |      |      |      |
| larvae/<br>pollen | 4.Sedliska    | 0.29 | 0.37 | n.d. | 5.98 | 0.30 | 31.08 | 0.74 | 0.57 | 1.61 | 2.36 | n.d. | n.d. | 0.33 | 0.16 | n.d. | 3.61 | 1.05 | 0.29 | 0.69 | 0.55 |
|                   | 5.Prešov      |      |      |      |      |      |       |      |      |      |      |      |      |      |      |      |      |      |      |      |      |
|                   | 6.Košice      | 0.16 | 0.08 | n.d. | 0.23 | 0.07 | 0.17  | n.d. | 0.28 | 0.51 | 0.55 | n.d. | n.d. | 0.38 | n.d. | n.d. | 0.58 | 0.38 | n.d. | 0.64 | 0.22 |
|                   | 7.Kurima      | 0.38 | 0.32 | n.d. | 0.42 | 0.16 | 0.44  | n.d. | 0.07 | 1.02 | 1.23 | n.d. | n.d. | 0.99 | 0.47 | 0.10 | 0.54 | 0.02 | 0.19 | 0.89 | 0.41 |
|                   | 1.Strážske_A  | 0.81 | 1.80 | n.d. | 1.03 | 2.53 | 1.47  | n.d. | 1.12 | 0.71 | 0.55 | n.d. | n.d. | 1.01 | n.d. | n.d. | 2.83 | 3.70 | 2.12 | 2.07 | 3.57 |
| bees/<br>larvae   | 2. Strážske_B |      |      | n.d. |      |      |       |      |      |      |      |      |      |      |      |      |      |      |      |      |      |
|                   | 3.Poša        | 1.12 | 1.40 | n.d. | 1.66 | 3.75 | 1.31  | n.d. | 0.71 | 1.16 | 0.97 | n.d. | n.d. | 0.90 | n.d. | n.d. | 2.95 | 2.58 | 1.56 | 1.72 | 2.15 |
|                   | 4.Sedliska    | 0.74 | 1.76 | n.d. | 0.26 | 2.46 | 0.04  | 2.29 | 0.66 | 0.56 | 0.38 | 0.49 | n.d. | 0.82 | 2.63 | n.d. | 0.62 | 3.54 | 1.44 | 1.85 | 2.77 |

|          |      |       |      |      |       |      |      |      |      |      |      |      |      |      |      |      |       |      |      |      |
|----------|------|-------|------|------|-------|------|------|------|------|------|------|------|------|------|------|------|-------|------|------|------|
| 5.Prešov | 0.87 | 2.03  | n.d. | 1.71 | 20.78 | 3.03 | n.d. | 0.79 | 0.85 | 1.02 | n.d. | n.d. | 0.94 | n.d. | n.d. | 0.45 | 7.68  | n.d. | 2.04 | 3.80 |
| 6.Košice | 1.17 | 10.62 | n.d. | 8.96 | 11.22 | 5.15 | n.d. | 5.53 | 1.93 | 1.26 | n.d. | n.d. | 2.73 | n.d. | n.d. | 4.80 | 41.28 | n.d. | 2.16 | 9.30 |
| 7.Kurima | 0.94 | 1.18  | 0.97 | 2.92 | 1.52  | 1.99 | n.d. | 2.31 | 1.31 | 1.09 | n.d. | n.d. | 0.77 | 1.08 | 2.64 | 1.21 | 59.30 | 1.48 | 1.30 | 2.13 |

n.d.: non-determined

**Table S2:** Correlation values between relevant bee samples (essential macro elements)

| Sample            | sampling location | Na   | Mg   | P      | K     | Ca   |
|-------------------|-------------------|------|------|--------|-------|------|
| bees/<br>honey    | 1.Strážske_A      | n.d. | n.d. | 39.21  | 9.52  | 2.85 |
|                   | 2. Strážske_B     | n.d. | n.d. | 32.57  | 11.66 | 1.82 |
|                   | 3.Poša            | n.d. | n.d. | 74.90  | 18.61 | 2.85 |
|                   | 4.Sedliska        | n.d. | n.d. | 59.47  | 5.79  | 3.88 |
|                   | 5.Prešov          | n.d. | n.d. | 55.72  | 4.94  | 2.74 |
|                   | 6.Košice          | n.d. | n.d. | 76.90  | 4.31  | 5.27 |
|                   | 7.Kurima          |      |      |        |       |      |
| larvae/<br>honey  | 1.Strážske_A      | n.d. | n.d. | 93.82  | 27.84 | 2.47 |
|                   | 2. Strážske_B     |      |      |        |       |      |
|                   | 3.Poša            | n.d. | n.d. | 152.36 | 46.04 | 2.17 |
|                   | 4.Sedliska        | n.d. | n.d. | 121.24 | 14.98 | 3.02 |
|                   | 5.Prešov          | n.d. | n.d. | 85.83  | 9.52  | 1.78 |
|                   | 6.Košice          | n.d. | n.d. | 75.46  | 5.41  | 1.29 |
|                   | 7.Kurima          |      |      |        |       |      |
| bees/<br>pollen   | 1.Strážske_A      |      |      |        |       |      |
|                   | 2. Strážske_B     |      |      |        |       |      |
|                   | 3.Poša            |      |      |        |       |      |
|                   | 4.Sedliska        | n.d. | 0.35 | 0.54   | 0.62  | 0.30 |
|                   | 5.Prešov          |      |      |        |       |      |
|                   | 6.Košice          | n.d. | 0.49 | 0.62   | 0.68  | 0.47 |
|                   | 7.Kurima          | n.d. | 0.58 | 0.96   | 0.87  | 0.42 |
| larvae/<br>pollen | 1.Strážske_A      |      |      |        |       |      |
|                   | 2. Strážske_B     |      |      |        |       |      |
|                   | 3.Poša            |      |      |        |       |      |
|                   | 4.Sedliska        | n.d. | 0.63 | 1.09   | 1.61  | 0.24 |
|                   | 5.Prešov          |      |      |        |       |      |
|                   | 6.Košice          | n.d. | 0.45 | 0.61   | 0.86  | 0.12 |
|                   | 7.Kurima          | n.d. | 0.60 | 0.95   | 1.06  | 0.26 |
| bees/<br>larvae   | 1.Strážske_A      | 1.18 | 0.44 | 0.42   | 0.34  | 1.16 |
|                   | 2. Strážske_B     |      |      |        |       |      |
|                   | 3.Poša            | 1.08 | 0.57 | 0.49   | 0.40  | 1.31 |
|                   | 4.Sedliska        | 0.85 | 0.55 | 0.49   | 0.39  | 1.29 |
|                   | 5.Prešov          | 0.65 | 0.60 | 0.65   | 0.52  | 1.54 |
|                   | 6.Košice          | 1.48 | 1.08 | 1.02   | 0.80  | 4.07 |
|                   | 7.Kurima          | 2.06 | 0.96 | 1.01   | 0.82  | 1.60 |

n.d.: non-determined

**Table S3.** Overview of computed *P*-values for Hg in Bees and Larvae

| Variable\ Test | Shapiro-Wilk | Anderson-Darling | Lilliefors | Jarque-Bera |
|----------------|--------------|------------------|------------|-------------|
| Bees           | 0.227        | 0.200            | 0.183      | 0.737       |
| Larvae         | 0.160        | 0.182            | 0.260      | 0.665       |

**Table S4.** Overview of computed *P*-values for Pb in Bees and Larvae

| Variable\ Test | Shapiro-Wilk | Anderson-Darling | Lilliefors   | Jarque-Bera |
|----------------|--------------|------------------|--------------|-------------|
| Bees           | <b>0.002</b> | <b>0.004</b>     | <b>0.003</b> | 0.220       |
| Larvae         | <b>0.016</b> | <b>0.015</b>     | <b>0.008</b> | 0.604       |

**Table S5.** Eigenvectors, factor loadings, correlations between variables and factors, and squared cosines of the observations, for toxic trace elements on bees

Eigenvectors:

|    | F1     | F2     | F3     | F4     |
|----|--------|--------|--------|--------|
| As | 0.640  | 0.018  | -0.085 | -0.764 |
| Cd | 0.556  | 0.258  | -0.580 | 0.537  |
| Hg | -0.082 | 0.955  | 0.275  | -0.077 |
| Pb | 0.524  | -0.146 | 0.762  | 0.351  |

Factor loadings:

|    | F1     | F2     | F3     | F4     |
|----|--------|--------|--------|--------|
| As | 0.986  | 0.018  | -0.063 | -0.152 |
| Cd | 0.857  | 0.262  | -0.431 | 0.107  |
| Hg | -0.126 | 0.971  | 0.204  | -0.015 |
| Pb | 0.808  | -0.148 | 0.566  | 0.070  |

Correlations between variables and factors:

|    | F1     | F2    | F3     | F4     |
|----|--------|-------|--------|--------|
| As | 0.986  | 0.018 | -0.063 | -0.152 |
| Cd | 0.857  | 0.262 | -0.431 | 0.107  |
| Hg | -0.126 | 0.971 | 0.204  | -0.015 |

|    |       |        |       |       |
|----|-------|--------|-------|-------|
| Pb | 0.808 | -0.148 | 0.566 | 0.070 |
|----|-------|--------|-------|-------|

Squared cosines of the observations:

|        | F1           | F2           | F3    | F4    |
|--------|--------------|--------------|-------|-------|
| Area 1 | 0.287        | <b>0.662</b> | 0.051 | 0.000 |
| Area 2 | <b>0.617</b> | 0.102        | 0.281 | 0.000 |
| Area 3 | <b>0.820</b> | 0.013        | 0.166 | 0.001 |
| Area 4 | <b>0.497</b> | 0.398        | 0.031 | 0.074 |
| Area 5 | <b>0.683</b> | 0.267        | 0.023 | 0.027 |
| Area 6 | 0.165        | <b>0.675</b> | 0.024 | 0.136 |
| Area 7 | <b>0.719</b> | 0.236        | 0.012 | 0.033 |

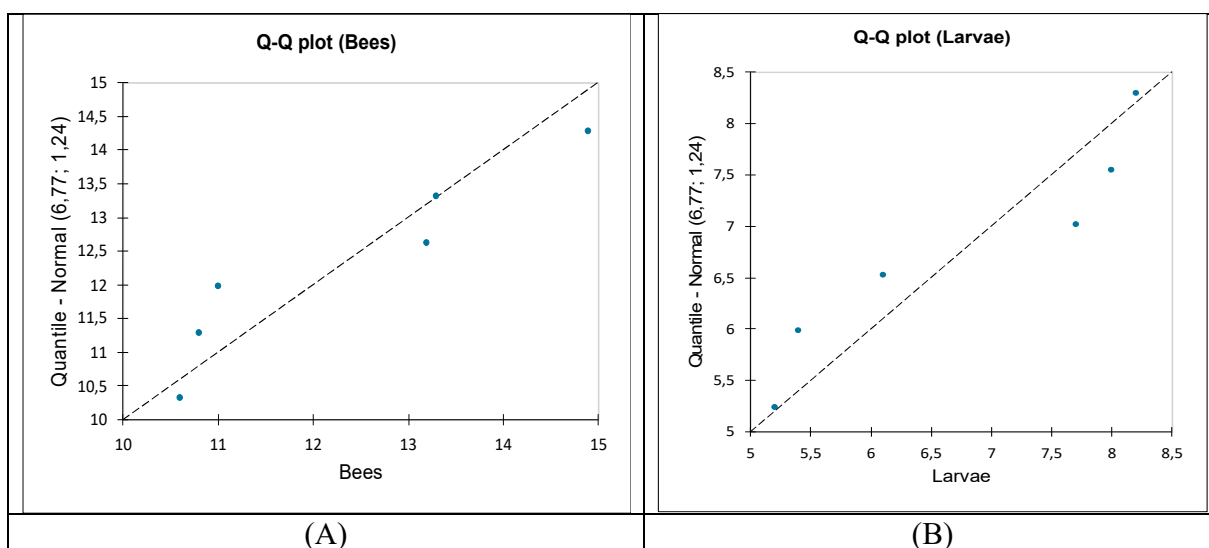

**Figure S1A–B.** Quantile-quantile plots for Hg concentration values in bees and larvae. (A) Q-Q plot for Hg in Bees. (B) Q-Q plot for Hg in Larvae

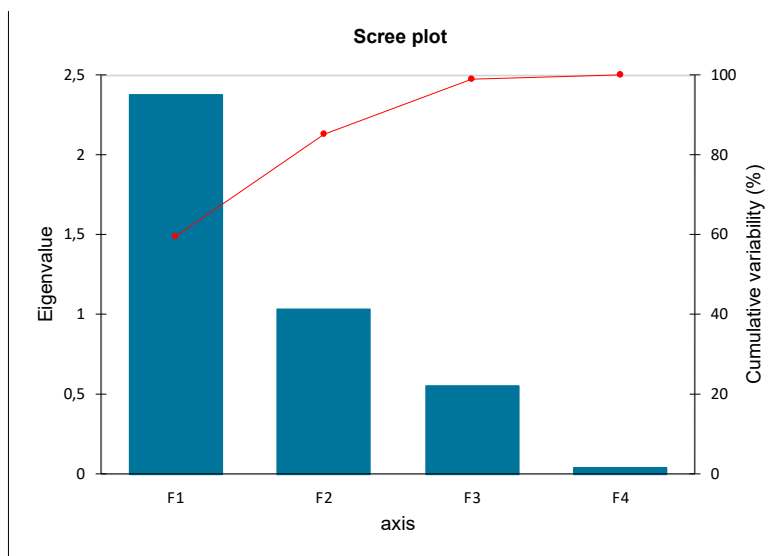

**Figure S2.** Scree plot of eigenvalue and % cumulative capacity for toxic trace elements on bees
